## Early haemodynamic and structural impact of transcatheter aortic valve replacement in pure aortic regurgitation

F. Graziani, E. Mencarelli, F. Burzotta, L. Paraggio, C. Aurigemma, E. Romagnoli, D. Pedicino, G. Locorotondo, A. Lombardo, A.M. Leone, D. Laezza, F. Crea, C. Trani

Fondazione Policlinico Universitario Gemelli IRCCS, Catholic University, Rome, Italy

**Funding Acknowledgement:** Type of funding source: None

**Background:** Patients with severe aortic regurgitation (AR) are treated by surgery and have variable left-ventricular (LV) “reverse remodelling” after intervention. Transcatheter-aortic-valve replacement (TAVR) might be considered in selected AR patients.

**Purpose:** To evaluate the hemodynamic and structural impact of TAVR in patients with pure AR.

**Methods:** Consecutive AR patients underwent TAVR in our Institution were identified. Left heart catheterization before and after TAVR and complete echocardiographic assessment before TAVR, after (24–72 hours) TAVR and at follow-up (3–12 months) were systematically performed. Hemodynamic and echocardiographic parameters were compared before and after TAVR.

**Results:** Twenty-two patients with severe AR, high surgical risk and advanced heart damage were treated by TAVR using mainly self-expandable prostheses. The procedure was successful in 21 patients (95.5%). An im-

mediate hemodynamic impact of the TAVR procedure was documented by different parameters and included significant decrease in LV end-diastolic pressure (from 26.2 to 20.1 mmHg,  $P=0.012$ ). Significant reduction in LV size (left ventricular end diastolic diameter (LVEDD):  $60.0\pm 8.0$  mm vs  $54.6\pm 8.1$  mm,  $p=0.002$ ) and mass (left ventricular mass indexed (LVMI):  $163.2\pm 58.8$  g/m<sup>2</sup> vs  $140.2\pm 45.6$  g/m<sup>2</sup>,  $p=0.004$ ) as well as a sharp reduction in systolic-pulmonary-arterial-pressure ( $48.3\pm 17.6$  vs  $32.9\pm 7.8$  mmHg,  $p<0.0001$ ) was documented at 24–72 hours. Furthermore, patients with baseline moderate-to-severe mitral and tricuspid regurgitation showed a significant, early, valvular regurgitation reduction. All favourable changes persisted at follow-up. More pronounced LVEDD reduction was predicted by baseline LVEDD ( $p=0.019$ ).

**Conclusions:** In patients with severe AR, TAVR determines a profound impact on heart remodelling, which is early detectable and durable.

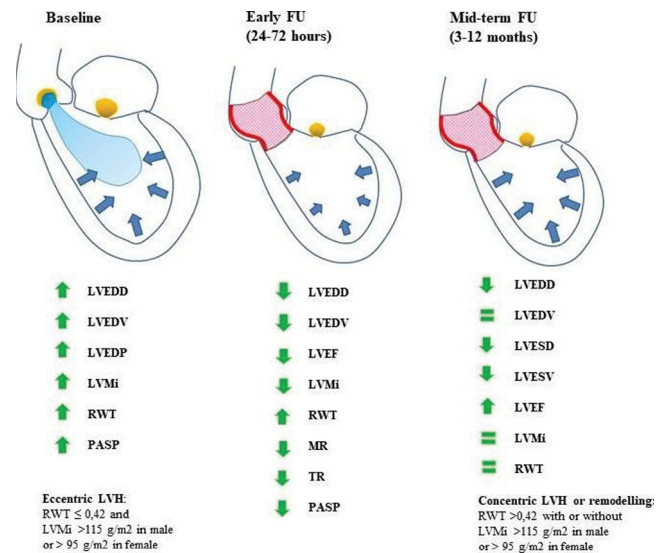

Impact of TAVR in pure AR
